# Supplementary material for: Xanthomonas Phage PBR31: Classifying the Unclassifiable
Source: MDPI journal article supplement (doi:10.3390/v16030406), 2024-03-06
Supplement: s1 [file s1]

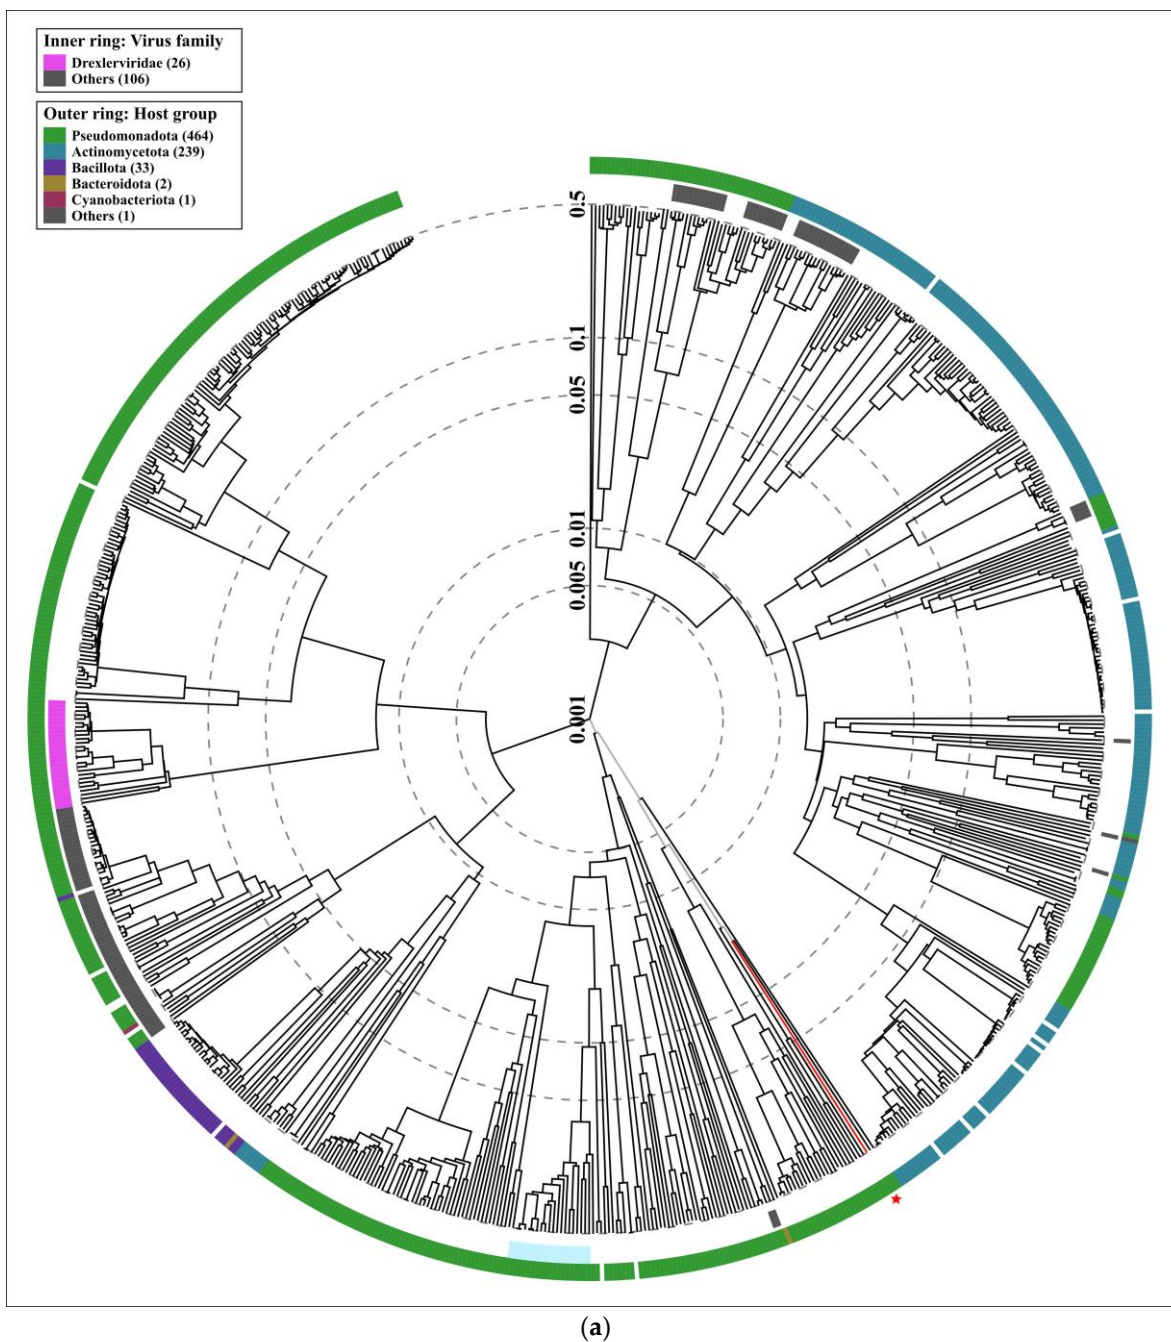

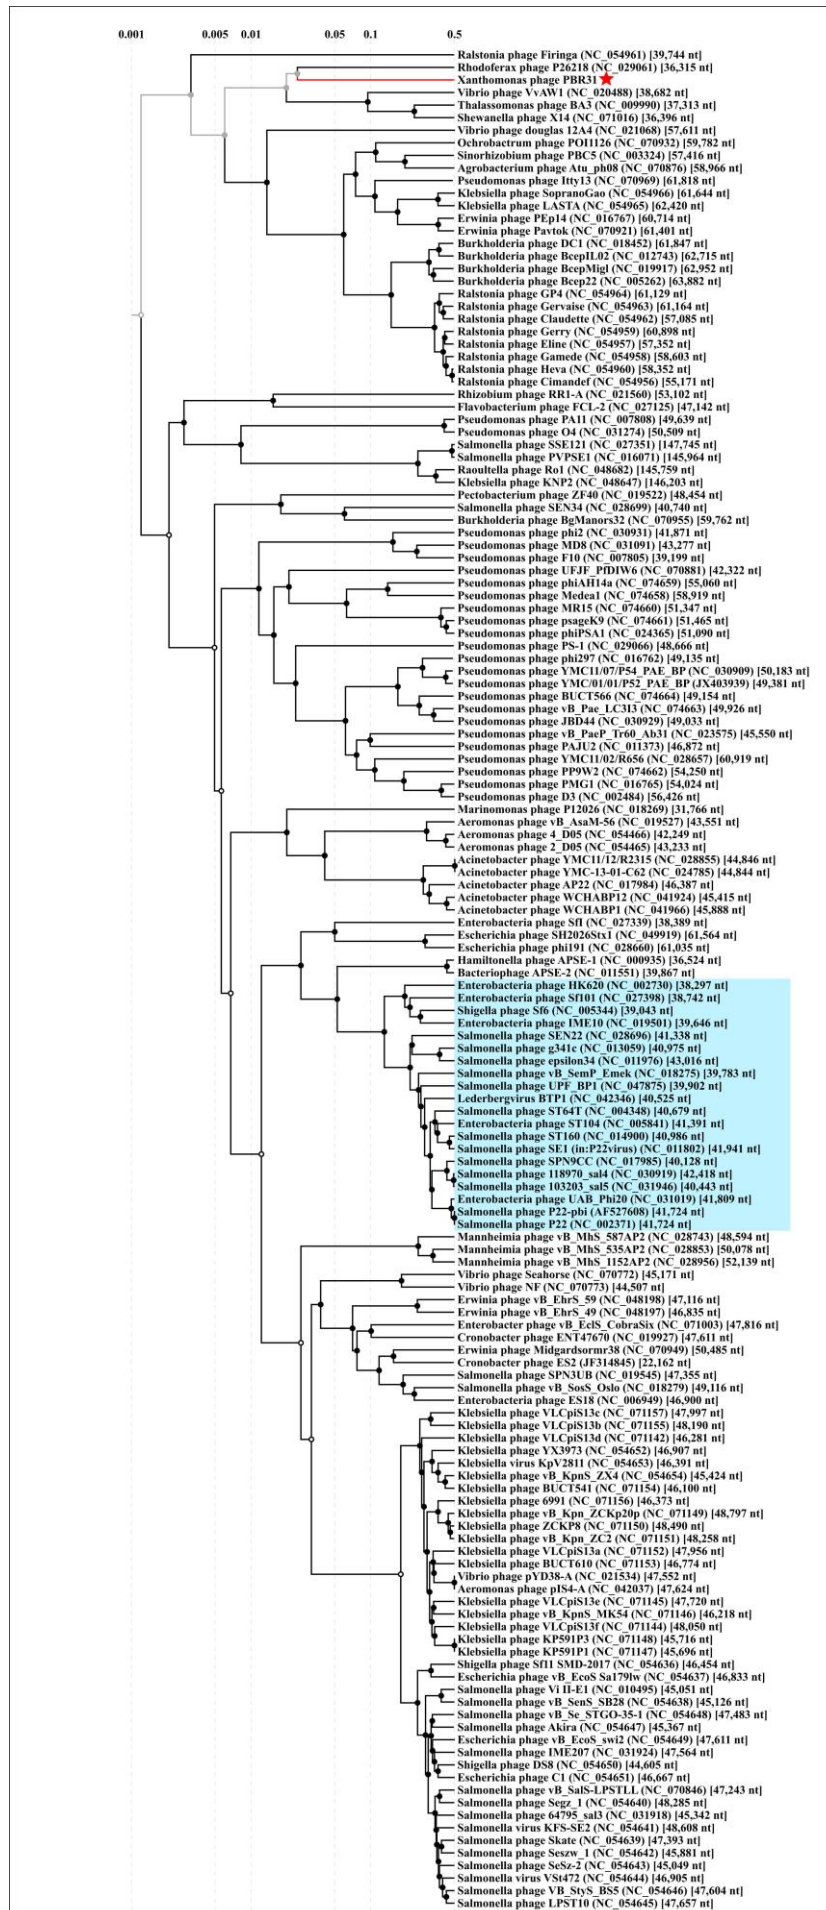

(b)

**Figure S1.** (a) Circular proteomic dendrogram plotted by ViPTree using the genome of PBR31 and genomes found by ViPTree to be related to the PBR31 genome. (b) The clade of the proteomic tree containing PBR31 phages and Lederbervirus phages. *Xanthomonas* phage PBR31 is marked with a red asterisk and Lederbervirus phages are highlighted in blue. The scale shows the number of estimated substitutions per site.
